# Supplementary material
Source: PubMed Central journal article supplement (PMC3894259)
Supplement: NIHMS499757-supplement-Supp_Fig_S1-S5.pdf [file NIHMS499757-supplement-Supp_Fig_S1-S5.pdf]

# Supplementary Figure 1

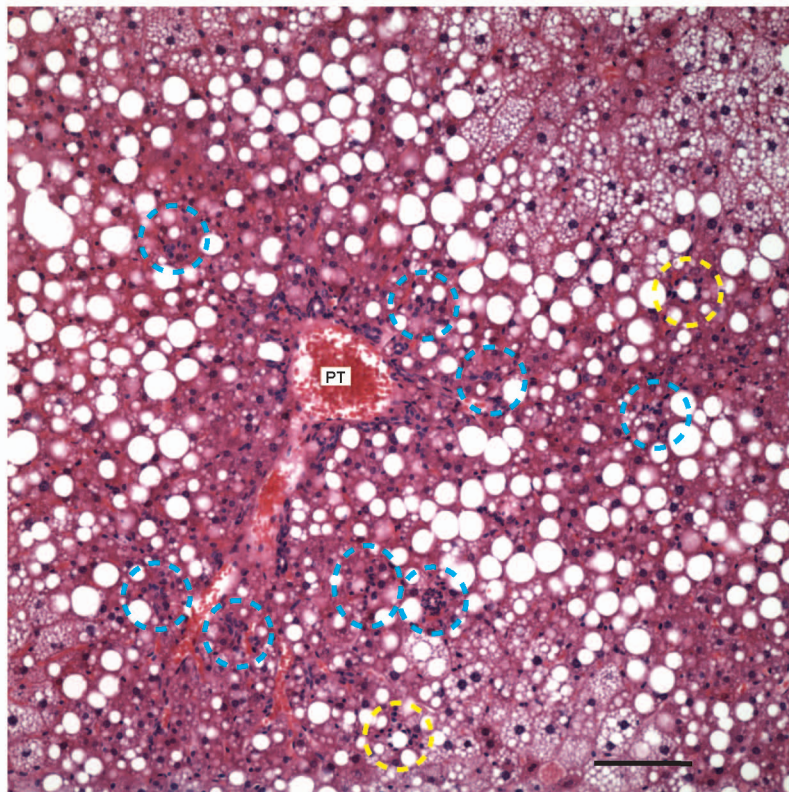

## Supplementary Figure 1

(a) A image of H&E staining of the liver from WT fed HFHSD.

Blue circles indicates microgranulomas, and yellow circles indicates small lipogranulomas.

PT, portal triad. CV, central vein. Bar 50  $\mu$ m.

## Supplementary Figure 2

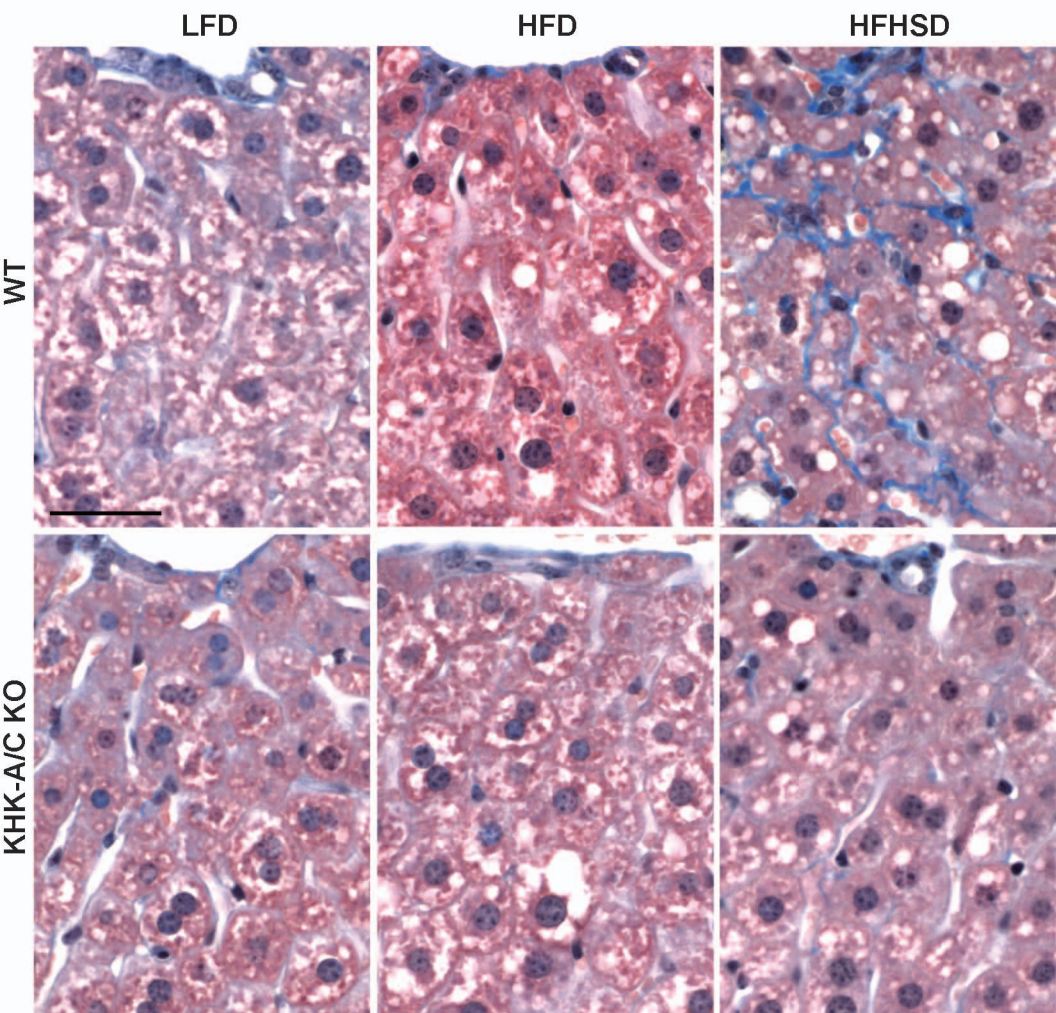

### Supplementary Figure 2

High-magnification images of trichrome staining of the liver from WT mice and KHK-A/C KO mice given *ad libitum* LFD, HFD or HFHSD for 15 weeks. Large collagen bundles were found in the sinusoids of liver of WT mice fed HFHSD. Bar 50  $\mu\text{m}$ .

## Supplementary Figure 3

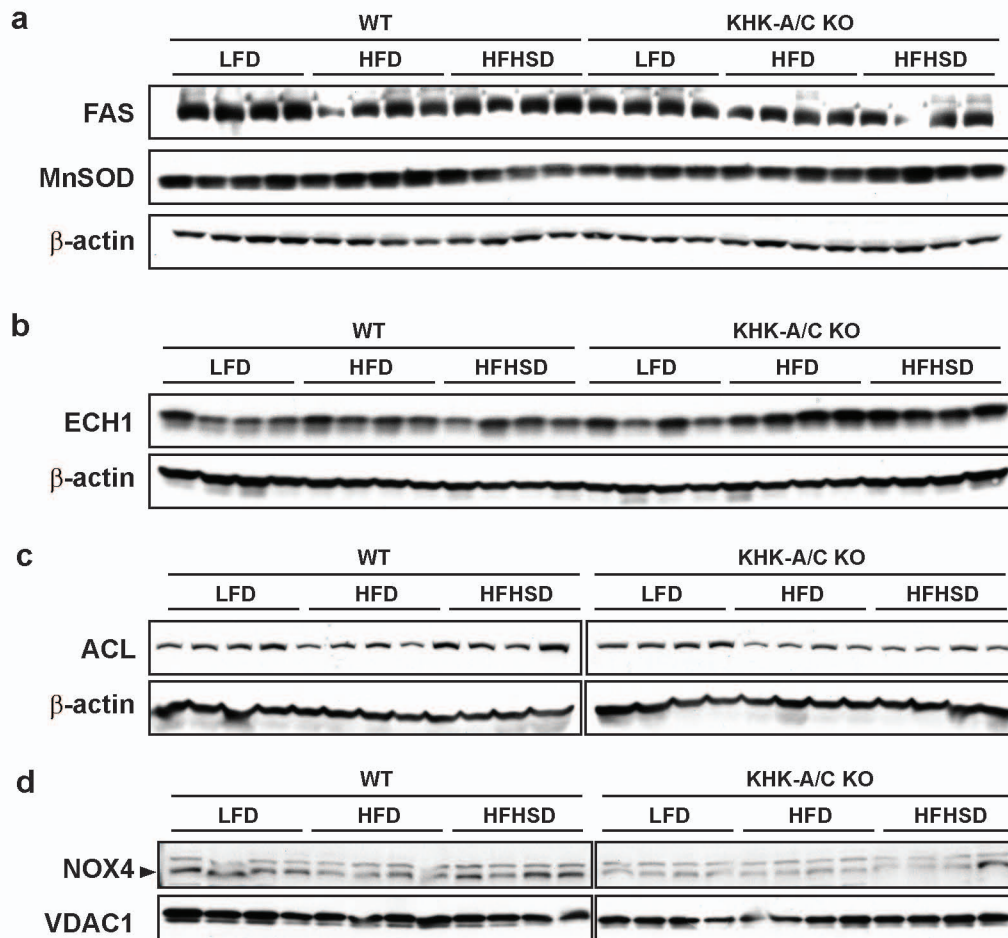

### Supplementary Figure 3

WT mice and KHK-A/C KO mice were given *ad libitum* LFD, HFD or HFHSD for 15 weeks.

(a) Images of western blot analysis for fatty acid synthase (FAS), manganese superoxide dismutase (MnSOD) and  $\beta$ -actin in liver from WT mice and KHK-A/C KO mice ( $n = 4$ ). (b) Images of western blot analysis for enoyl CoA-hydratase (ECH1) and  $\beta$ -actin in liver from WT mice and KHK-A/C KO mice ( $n = 4$ ). (c) Images of western blot analysis for ATP citrate lyase (ACL) and  $\beta$ -actin in liver from WT mice and KHK-A/C KO mice ( $n = 4$ ). (d) Images of western blot analysis for mitochondrial NADPH oxidase 4 (NOX4) in liver from WT mice and KHK-A/C KO mice ( $n = 4$ ). Voltage-dependent anion channel 1 (VDAC1) was used as loading control.

## Supplementary Figure 4

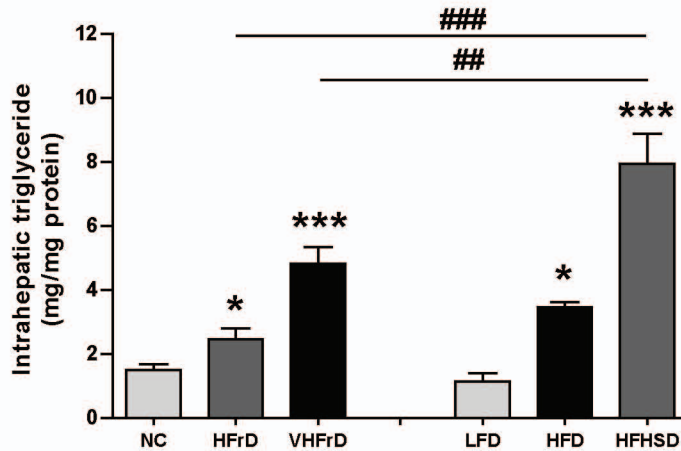

### Supplementary Figure 4

Intrahepatic triglyceride levels of WT mice given *ad libitum* normal chow with tap water (NC), with 15% fructose water (low fat high fructose, HFrD) or 30% fructose water (low fat very high fructose, VHFrD) for 25 weeks ( $n = 6$ ), and those of WT mice fed *ad libitum* LFD, HFD or HFHSD for 15 weeks ( $n = 6$ ). Data represent means  $\pm$  s.e.m. \* $P < 0.05$ , \*\*\* $P < 0.001$  vs. WT fed LFD. ### $P < 0.01$ . #### $P < 0.001$ .

# Supplementary Figure 5

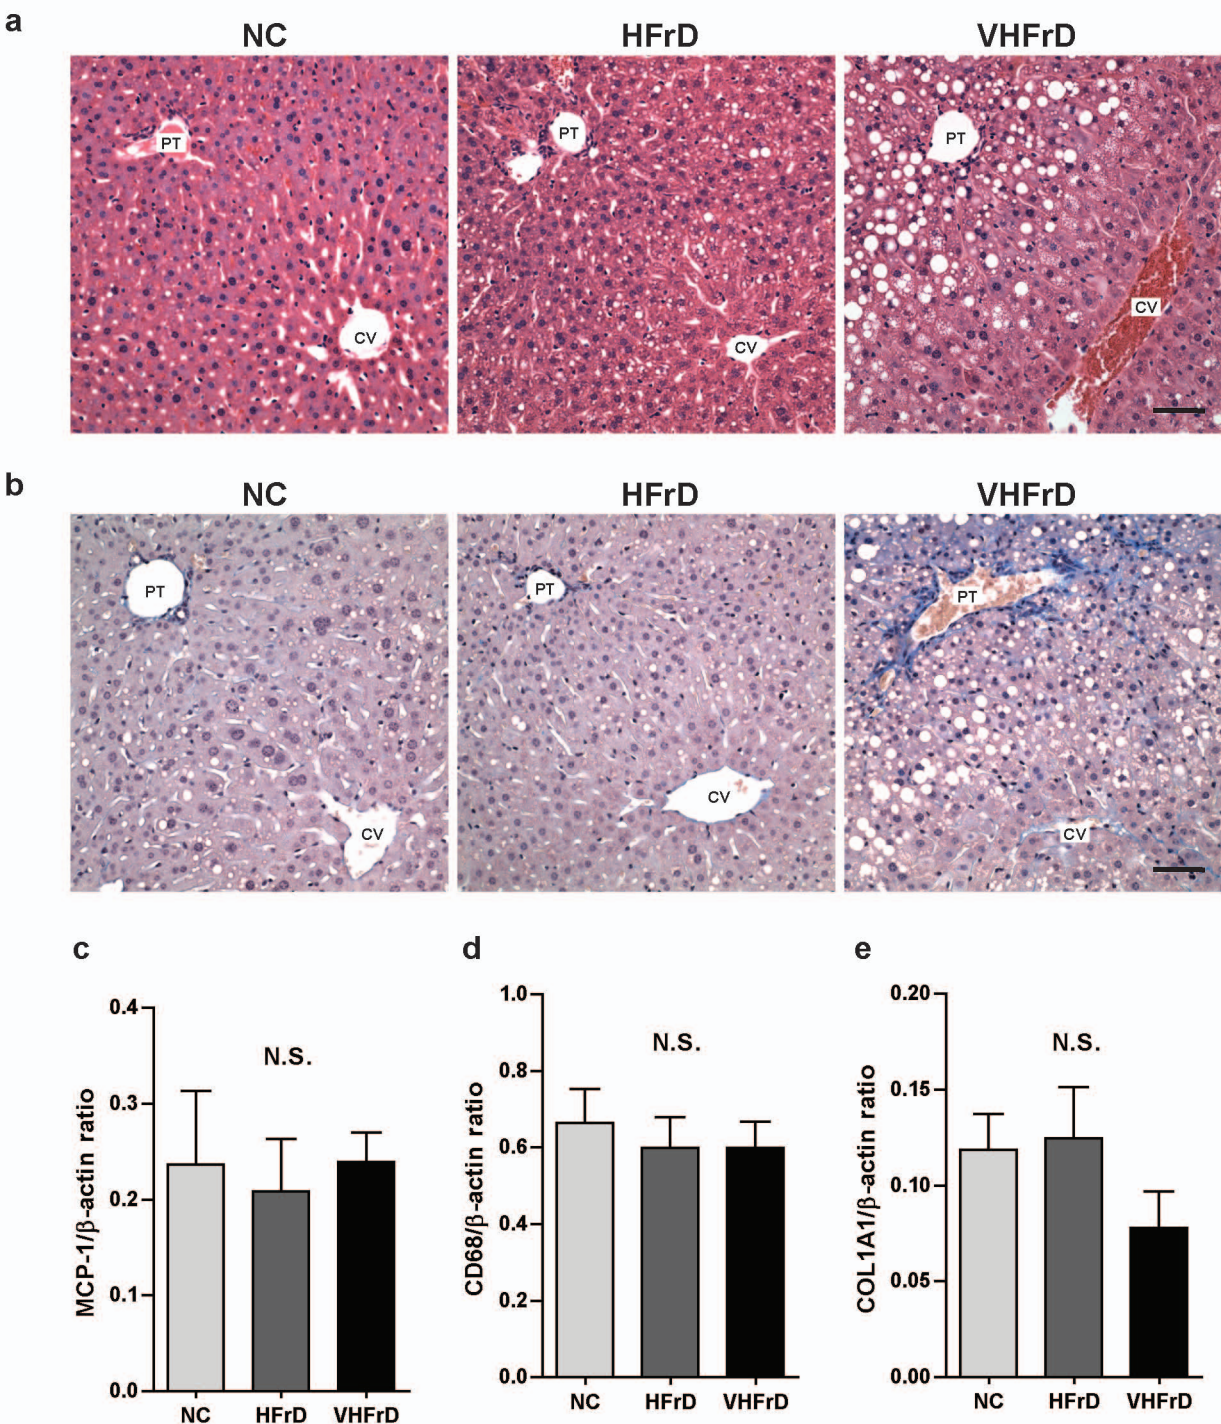

## Supplementary Figure 5

WT mice were given *ad libitum* normal chow with tap water (NC), with 15% fructose water (low fat high fructose, HFrD) or 30% fructose water (low fat very high fructose, VHFrD) for 25 weeks. (a) Representative images of H&E stained liver. Bar, 50  $\mu$ m. (b) Representative images of trichrome stained liver. Bar, 50  $\mu$ m. (c-e) Quantitative real-time PCR for mouse MCP-1 (c), CD68 (d) and collagen type I (COL1A1, e). ( $n = 7-8$ ).  $\beta$ -actin was used as an internal control. Data represent means  $\pm$  s.e.m. N.S., no significant. CV, central vein. PT, portal triad.
